# Supplementary material for: Fabrication of Sb3+sensor based on 1,1′-(-(naphthalene-2,3-diylbis(azanylylidene))bis(methanylylidene))bis(naphthalen-2-ol)/nafion/glassy carbon electrode assembly by electrochemical approach
Source: Royal Society of Chemistry journal article supplement (doi:10.1039/c8ra01827h), 2018-01-01
Supplement: c8ra01827h1.pdf [file c8ra01827h1.pdf]

### Electronic Supplemental Material (ESM)

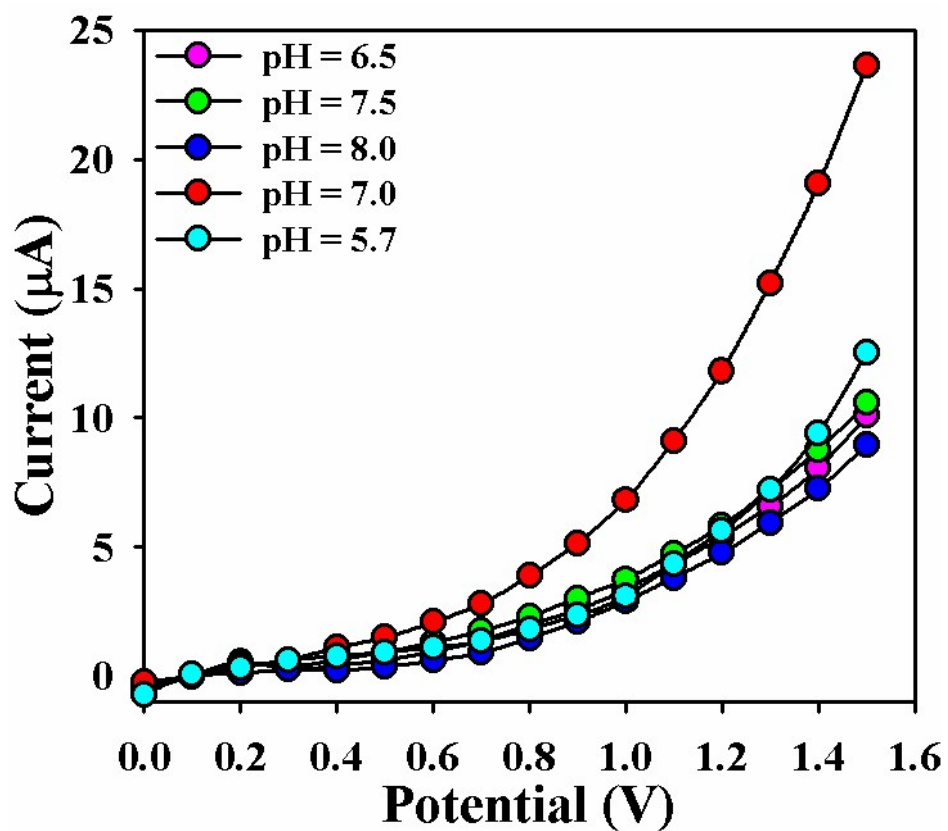

Fig. S1: Optimization of operational condition (Effect of pH).

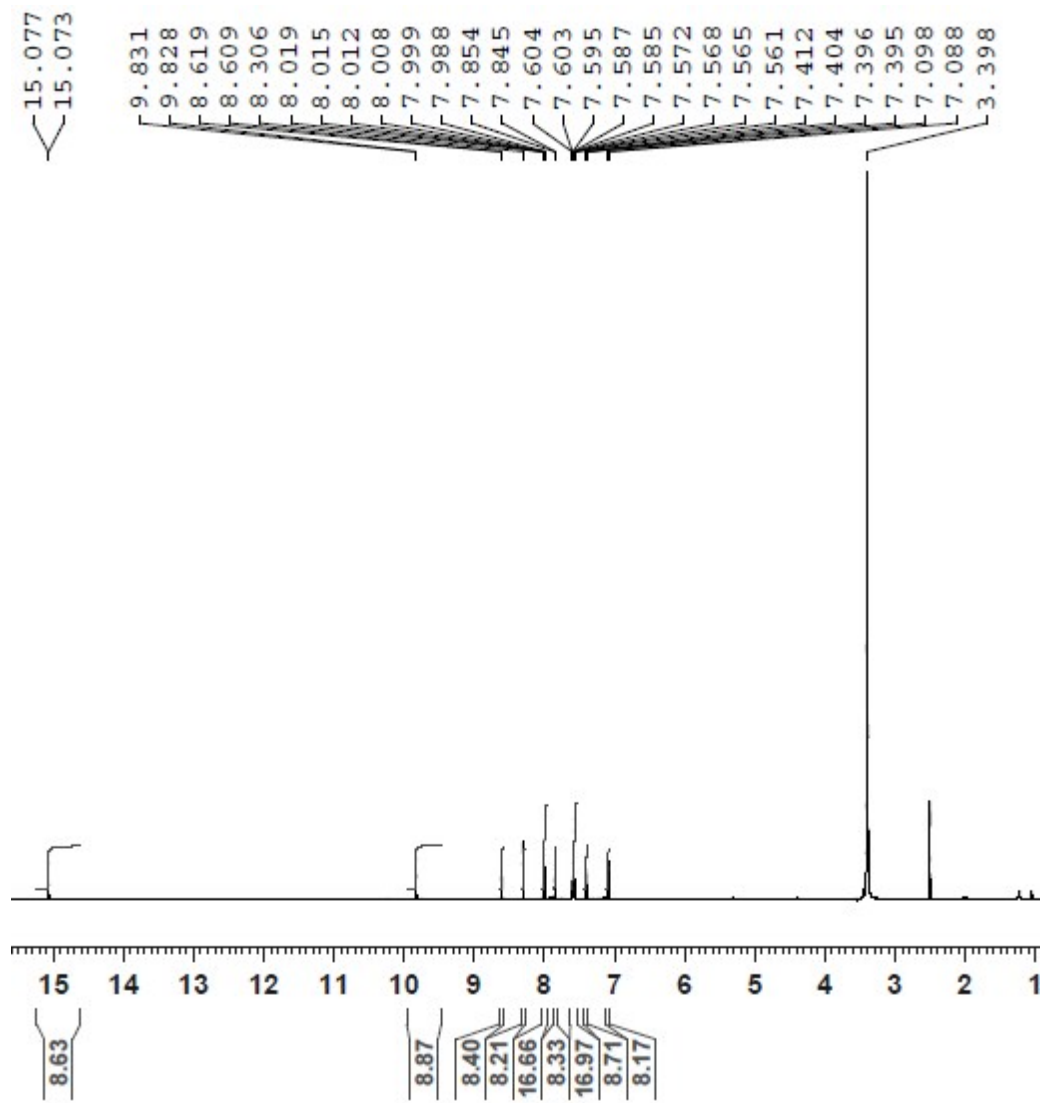

Fig. S2:  $^1\text{H}$ NMR of NDNA  $\text{DMSO-d}_6$ .

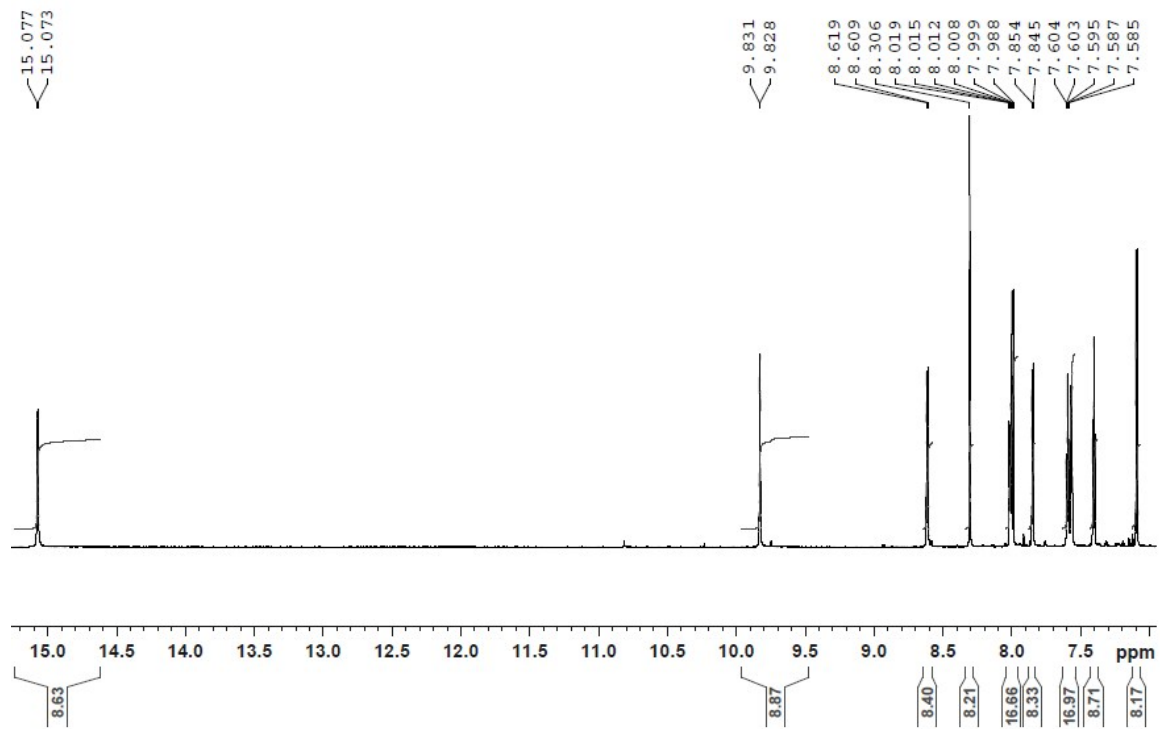

Fig. S3:  $^1\text{H}$ NMR of NDNA in  $\text{DMSO-d}_6$ .

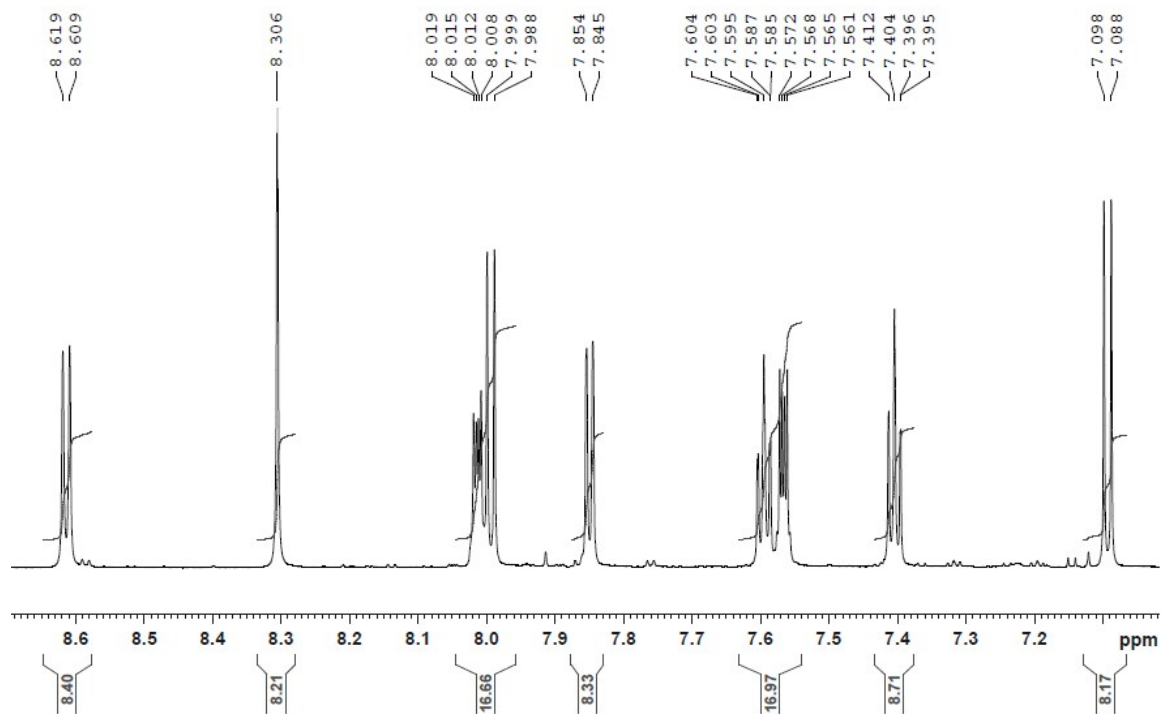

Fig. S4:  $^1\text{H}$ NMR of NDNA in  $\text{DMSO-d}_6$ .

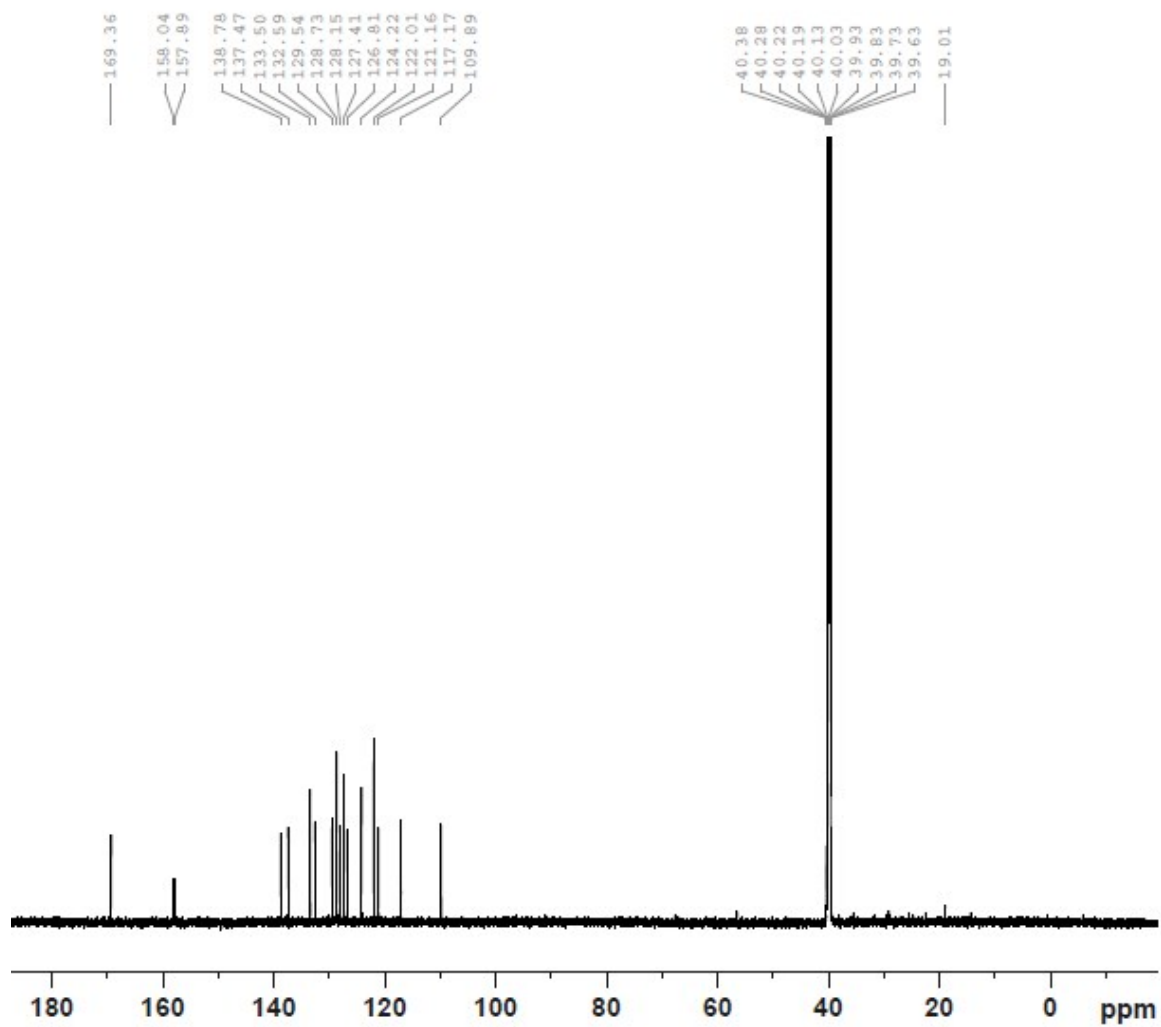

**Fig. S5:**  $^{13}\text{C}$ NMR of NDNA in  $\text{DMSO-d}_6$ .

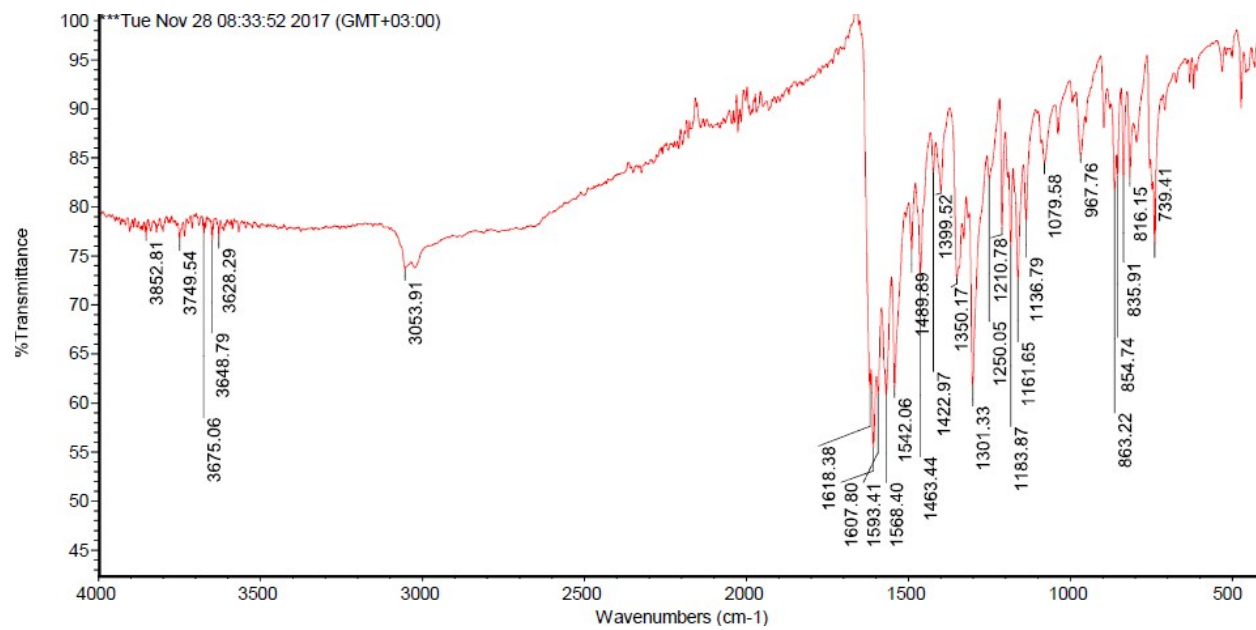

**Fig. S6:** ATR-FTIR of NDNA.

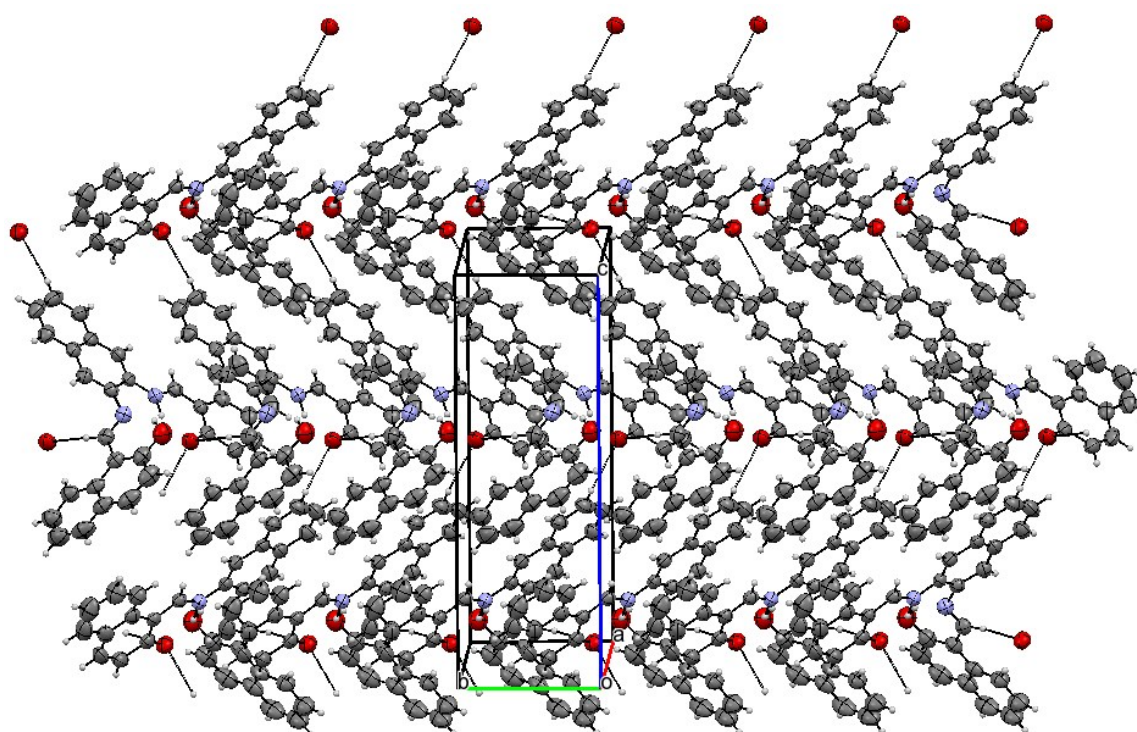

**Fig. S7:** A view of the formation of two-dimensional network through the intermolecular hydrogen bonding.

**Table S1: Selected bond lengths for 17082.**

| Atom | Atom | Length/Å  | Atom | Atom | Length/Å  |
|------|------|-----------|------|------|-----------|
| C1   | C2   | 1.360 (5) | C16  | C17  | 1.403 (6) |
| C1   | C10  | 1.434 (5) | C16  | C21  | 1.411 (7) |
| C1   | N2   | 1.424 (5) | C17  | C18  | 1.398 (6) |
| C2   | C3   | 1.418 (5) | C18  | C19  | 1.374 (6) |
| C3   | C4   | 1.413 (5) | C19  | C20  | 1.373 (8) |
| C3   | C8   | 1.422 (6) | C20  | C21  | 1.357 (8) |
| C4   | C5   | 1.357 (6) | C22  | C23  | 1.447 (6) |
| C5   | C6   | 1.403 (7) | C22  | N2   | 1.281 (5) |
| C6   | C7   | 1.357 (6) | C23  | C24  | 1.373 (6) |
| C7   | C8   | 1.406 (6) | C23  | C28  | 1.440 (6) |
| C8   | C9   | 1.412 (5) | C24  | C25  | 1.416 (6) |
| C9   | C10  | 1.366 (5) | C24  | O2   | 1.342 (6) |
| C10  | N1   | 1.397 (5) | C25  | C26  | 1.359 (8) |
| C11  | C12  | 1.385 (5) | C26  | C27  | 1.400 (7) |
| C11  | N1   | 1.330 (5) | C27  | C28  | 1.428 (6) |
| C12  | C13  | 1.437 (6) | C27  | C32  | 1.392 (7) |
| C12  | C17  | 1.461 (5) | C28  | C29  | 1.400 (6) |
| C13  | C14  | 1.433 (6) | C29  | C30  | 1.367 (6) |
| C13  | O1   | 1.271 (5) | C30  | C31  | 1.411 (8) |



|     |     |           |     |     |           |
|-----|-----|-----------|-----|-----|-----------|
| C14 | C15 | 1.341 (7) | C31 | C32 | 1.352 (7) |
| C15 | C16 | 1.423 (7) |     |     |           |

**Table S2: Selected bond angles for 17082.**

| Atom | Atom | Atom | Angle/°   | Atom | Atom | Atom | Angle/°   |
|------|------|------|-----------|------|------|------|-----------|
| C2   | C1   | C10  | 119.8 (4) | C21  | C16  | C15  | 121.3 (5) |
| C2   | C1   | N2   | 122.8 (4) | C16  | C17  | C12  | 119.0 (4) |
| N2   | C1   | C10  | 117.4 (3) | C18  | C17  | C12  | 123.1 (4) |
| C1   | C2   | C3   | 122.0 (4) | C18  | C17  | C16  | 117.8 (4) |
| C2   | C3   | C8   | 118.1 (4) | C19  | C18  | C17  | 121.0 (5) |
| C4   | C3   | C2   | 123.2 (4) | C20  | C19  | C18  | 121.1 (5) |
| C4   | C3   | C8   | 118.7 (4) | C21  | C20  | C19  | 119.4 (5) |
| C5   | C4   | C3   | 120.9 (4) | C20  | C21  | C16  | 121.2 (5) |
| C4   | C5   | C6   | 120.2 (5) | N2   | C22  | C23  | 122.3 (4) |
| C7   | C6   | C5   | 120.5 (5) | C24  | C23  | C22  | 119.7 (4) |
| C6   | C7   | C8   | 121.1 (5) | C24  | C23  | C28  | 120.2 (4) |
| C7   | C8   | C3   | 118.5 (4) | C28  | C23  | C22  | 119.8 (4) |
| C7   | C8   | C9   | 122.3 (4) | C23  | C24  | C25  | 120.3 (5) |
| C9   | C8   | C3   | 119.2 (4) | O2   | C24  | C23  | 123.3 (4) |
| C10  | C9   | C8   | 121.6 (4) | O2   | C24  | C25  | 116.4 (5) |
| C9   | C10  | C1   | 119.4 (3) | C26  | C25  | C24  | 119.5 (5) |

|     |     |     |           |     |     |     |           |
|-----|-----|-----|-----------|-----|-----|-----|-----------|
| C9  | C10 | N1  | 124.5 (4) | C25 | C26 | C27 | 122.9 (5) |
| N1  | C10 | C1  | 116.1 (3) | C26 | C27 | C28 | 118.1 (5) |
| N1  | C11 | C12 | 123.4 (4) | C32 | C27 | C26 | 122.6 (5) |
| C11 | C12 | C13 | 119.4 (4) | C32 | C27 | C28 | 119.3 (5) |
| C11 | C12 | C17 | 121.1 (4) | C27 | C28 | C23 | 118.7 (4) |
| C13 | C12 | C17 | 119.4 (3) | C29 | C28 | C23 | 123.8 (4) |
| C14 | C13 | C12 | 118.4 (4) | C29 | C28 | C27 | 117.5 (5) |
| O1  | C13 | C12 | 122.0 (4) | C30 | C29 | C28 | 121.6 (5) |
| O1  | C13 | C14 | 119.6 (4) | C29 | C30 | C31 | 120.5 (6) |
| C15 | C14 | C13 | 121.0 (4) | C32 | C31 | C30 | 118.8 (5) |
| C14 | C15 | C16 | 122.8 (4) | C31 | C32 | C27 | 122.4 (5) |
| C17 | C16 | C15 | 119.3 (4) | C11 | N1  | C10 | 125.8 (4) |
| C17 | C16 | C21 | 119.4 (5) | C22 | N2  | C1  | 119.3 (3) |
